# Supplementary material
Source: bioRxiv or medRxiv preprint supplement (https://www.medrxiv.org/highwire/filestream/69293/field_highwire_adjunct_files/1/19007963-2.pdf)
Supplement: Supplementary file [file 19007963-2.pdf]

**Suppl table 2: Summary of parameters recorded from a cohort of 112 adults with HBV infection in Cape Town, South Africa, comparing features of those with HBV monoinfection (n=74) versus HIV/HBV coinfection (n=38).** This is an extended version of tables 1 and 2 presented in the main text.

|                                                        | <b>Whole Cohort</b> | <b>HBV monoinfection</b> | <b>HIV/HBV coinfection</b> | <b>p-value<sup>a</sup></b> |
|--------------------------------------------------------|---------------------|--------------------------|----------------------------|----------------------------|
| Sex M:F<br>(% male)                                    | 62:50<br>(%)        | 44:30<br>(%)             | 18:20<br>(%)               | 0.24                       |
| Median age in years at enrollment <sup>b</sup> (IQR)   | 44<br>(36-53)       | 46<br>(36-55)            | 41<br>(37-50)              | 0.28                       |
| Median body weight in kg <sup>c</sup> (IQR)            | 73<br>(60-85)       | 75<br>(60-87)            | 72<br>(59-80)              | 0.20                       |
| Proportion HBeAg positive <sup>d</sup> (%)             | 20/102<br>(19.6%)   | 8/67<br>(11.9%)          | 12/35<br>(34.3%)           | <b>0.009</b>               |
| Median ALT in males, iu/ml <sup>e</sup> (IQR)          | 29<br>(21-43)       | 31<br>(22-45)            | 27<br>(21-39)              | 0.66                       |
| Median ALT in females, iu/ml <sup>e</sup> (IQR)        | 18<br>(16-23)       | 18<br>(15-22)            | 18<br>(16-25)              | 0.39                       |
| Proportion with elevated ALT above ULN (%)             | 49/109<br>(45%)     | 33/72<br>(46%)           | 16/37<br>(43%)             | 0.84                       |
| Median AST, iu/ml <sup>f</sup> (IQR)                   | 29<br>(22-44)       | 29<br>(22-46)            | 31<br>(21-43)              | 0.87                       |
| Proportion with elevated AST above ULN (%)             | 27/85<br>(32%)      | 16/50<br>(32%)           | 11/35                      | 1.0                        |
| Median BR, mmol/L (IQR)                                | 7<br>(5-13)         | 9<br>(5-15)              | 5<br>(4-9)                 | <b>0.003</b>               |
| Proportion with elevated BR above ULN <sup>g</sup> (%) | 14/95<br>(14.7%)    | 12/61<br>(19.7%)         | 2/34<br>(6.0%)             | 0.08                       |
| Median platelet count, x10 <sup>3</sup> / ul (IQR)     | 226<br>(158-292)    | 227<br>(153-291)         | 249<br>(166-307)           | 0.38                       |
| Proportion with thrombocytopaenia <sup>h</sup> (%)     | 10/97<br>(10.3%)    | 10/62<br>(16%)           | 0/35<br>(0%)               | <b>0.01</b>                |
| Proportion with CKD II or III <sup>i</sup> (%)         | 31/99<br>(31%)      | 21/63<br>(33%)           | 10/36<br>(28%)             | 0.66                       |

|                                                                    |                                |                                  |                               |                   |
|--------------------------------------------------------------------|--------------------------------|----------------------------------|-------------------------------|-------------------|
| Proportion with APRI score >2                                      | 8/79<br>(10%)                  | 8/47<br>(17%)                    | 0/32<br>(0%)                  | <b>0.02</b>       |
| Proportion with FIB-4 score >3.25                                  | 12/78<br>(15%)                 | 10/46<br>(22%)                   | 2/32<br>(6%)                  | 0.11              |
| Proportion with documented clinical complications <sup>l</sup> (%) | 18/106<br>(17%)                | 14/68<br>(21%)                   | 4/38<br>(11%)                 | 0.3               |
| Proportion assessed by elastography (%)                            | 38/112<br>(34%)                | 8/74<br>(11%)                    | 30/38<br>(79%)                | <b>&lt;0.0001</b> |
| Median elastography score, kPa <sup>k</sup> (IQR)                  | 5.7<br>(4.7-8.2)               | 6.9<br>(4.9-10.9)                | 5.6<br>(4.5-7.0)              | 0.28              |
| Proportion with elastography score >6kPa (%)                       | 16/38<br>(42%)                 | 4/8<br>(50%)                     | 12/30<br>(40%)                | 0.7               |
| Proportion with elastography score >9kPa (%)                       | 7/38<br>(18%)                  | 3/8<br>(38%)                     | 4/30<br>(13%)                 | 0.14              |
| Proportion on antiviral treatment <sup>l</sup> (%)                 | 71/108<br>(66%)                | 34/70<br>(49%)                   | 37/38<br>(97)                 | <b>&lt;0.0001</b> |
| Median duration of therapy <sup>m</sup> , months (IQR)             | 31<br>(14-66)                  | 29<br>(7-63)                     | 37<br>(18-66)                 | 0.1               |
| Median HBV DNA viral load IU/ml <sup>n</sup> (range)               | 31<br>(0-1.7x10 <sup>8</sup> ) | 90<br>(0 - 1.7x10 <sup>8</sup> ) | 0<br>(0-1.0x10 <sup>8</sup> ) | <b>0.049</b>      |
| Proportion of HBV viraemia undetectable <sup>o</sup>               | 40/96<br>(42%)                 | 20/61<br>(33%)                   | 20/35<br>(57%)                | <b>0.03</b>       |

IQR = inter-quartile range; ALT = alanine transferase; ULN = upper limit of normal. <sup>a</sup>p-value for categorical variables by Fisher's Exact Test, and for continuous variables by Mann Whitney test. <sup>b</sup>Age available for 111/112 individuals. <sup>c</sup>Body weight available for 108/112 individuals. <sup>d</sup>HBeAg status available for 102/112 individuals. <sup>e</sup>ALT available for 60/62 males and 49/50 females, with ULN defined as 19 iu/ml for females and 30 iu/ml for males. <sup>f</sup>AST available for 85/112 individuals, with ULN defined as 40 iu/ml. <sup>g</sup>BR available for 95/112 individuals; ULN defined as 17 mmol/L. <sup>h</sup>Platelet count available for 97/112 individuals; moderate/severe thrombocytopenia defined as platelet count <75 x10<sup>3</sup> / ul [26]. <sup>i</sup>CKD (chronic kidney disease) stages II and III defined as eGFR <90 ml/min/1.73m<sup>2</sup>. <sup>j</sup>Clinical complications reviewed for 108/112 individuals, defined as a documented diagnosis of HCC and/or cirrhosis. <sup>k</sup>Elastography data available for 38/112 individuals. <sup>l</sup>Antiviral treatment data available for 108/112 individuals. <sup>m</sup>Duration of therapy defined for 29 HBV monoinfected and 27 HBV/HIV coinfecting individuals. <sup>n</sup>HBV DNA viral load available for 61/74 HBV monoinfected and 35/38 HIV coinfecting individuals. <sup>o</sup>Undetectable HBV DNA defined as viral load in serum below limit of detection of assay (typically HBV DNA <20 IU/ml).
